# Supplementary material for: Decreased Mortality Rate Among COVID-19 Patients Prescribed Statins: Data From Electronic Health Records in the US
Source: PubMed Central journal article supplement (PMC7887302; doi:10.3389/fmed.2021.639804), 2021-02-03
Supplement: Table_1.pdf [file Table_1.pdf]

| Permutation       | On Statin BMI                          |                           |                              |                          |                             |                          | Control BMI                               |                           |                              |                          |                             |                          | (Case median) - (Control median) (kg/m <sup>2</sup> ) | Mann Whitney U, p-value |
|-------------------|----------------------------------------|---------------------------|------------------------------|--------------------------|-----------------------------|--------------------------|-------------------------------------------|---------------------------|------------------------------|--------------------------|-----------------------------|--------------------------|-------------------------------------------------------|-------------------------|
|                   | N case with BMI value (N total = 2297) | mean (kg/m <sup>2</sup> ) | std dev (kg/m <sup>2</sup> ) | min (kg/m <sup>2</sup> ) | median (kg/m <sup>2</sup> ) | max (kg/m <sup>2</sup> ) | N control with BMI value (N total = 4594) | mean (kg/m <sup>2</sup> ) | std dev (kg/m <sup>2</sup> ) | min (kg/m <sup>2</sup> ) | median (kg/m <sup>2</sup> ) | max (kg/m <sup>2</sup> ) |                                                       |                         |
| <b>Matching 1</b> |                                        |                           |                              |                          |                             |                          |                                           |                           |                              |                          |                             |                          |                                                       |                         |
| 1                 | 2034                                   | 31.72                     | 16.97                        | 14.102                   | 29.04                       | 273                      | 3855                                      | 30.14                     | 14.68                        | 9.5                      | 27.9                        | 260                      | 1.14                                                  | 6E-10                   |
| 2                 | 2034                                   | 31.72                     | 16.97                        | 14.102                   | 29.04                       | 273                      | 3789                                      | 30.15                     | 14.71                        | 9.5                      | 27.93                       | 260                      | 1.11                                                  | 2E-09                   |
| 3                 | 2034                                   | 31.72                     | 16.97                        | 14.102                   | 29.04                       | 273                      | 3848                                      | 30.27                     | 15.97                        | 9.5                      | 27.96                       | 260                      | 1.08                                                  | 2E-10                   |
| 4                 | 2034                                   | 31.72                     | 16.97                        | 14.102                   | 29.04                       | 273                      | 3867                                      | 30.31                     | 15.70                        | 9.5                      | 27.92                       | 260                      | 1.12                                                  | 1E-09                   |
| 5                 | 2034                                   | 31.72                     | 16.97                        | 14.102                   | 29.04                       | 273                      | 3884                                      | 30.39                     | 15.85                        | 9.5                      | 27.945                      | 256                      | 1.095                                                 | 5E-09                   |
| 6                 | 2034                                   | 31.72                     | 16.97                        | 14.102                   | 29.04                       | 273                      | 3854                                      | 30.16                     | 14.87                        | 9.5                      | 27.93                       | 256                      | 1.11                                                  | 8E-10                   |
| 7                 | 2034                                   | 31.72                     | 16.97                        | 14.102                   | 29.04                       | 273                      | 3856                                      | 30.23                     | 14.80                        | 9.5                      | 28                          | 260                      | 1.04                                                  | 5E-09                   |
| 8                 | 2034                                   | 31.72                     | 16.97                        | 14.102                   | 29.04                       | 273                      | 3858                                      | 30.24                     | 15.35                        | 9.5                      | 27.85                       | 268.21                   | 1.19                                                  | 7E-10                   |
| 9                 | 2034                                   | 31.72                     | 16.97                        | 14.102                   | 29.04                       | 273                      | 3862                                      | 30.17                     | 14.76                        | 9.5                      | 27.955                      | 260                      | 1.085                                                 | 4E-09                   |
| 10                | 2034                                   | 31.72                     | 16.97                        | 14.102                   | 29.04                       | 273                      | 3864                                      | 30.20                     | 14.79                        | 9.5                      | 28                          | 260                      | 1.04                                                  | 4E-09                   |
| <b>Matching 2</b> |                                        |                           |                              |                          |                             |                          |                                           |                           |                              |                          |                             |                          |                                                       |                         |
| 1                 | 2034                                   | 31.72                     | 16.97                        | 14.102                   | 29.04                       | 273                      | 4014                                      | 31.41                     | 17.30                        | 9.5                      | 28.345                      | 260                      | 0.695                                                 | 4E-03                   |
| 2                 | 2034                                   | 31.72                     | 16.97                        | 14.102                   | 29.04                       | 273                      | 4029                                      | 31.42                     | 17.70                        | 9.5                      | 28.3                        | 260                      | 0.74                                                  | 2E-03                   |
| 3                 | 2034                                   | 31.72                     | 16.97                        | 14.102                   | 29.04                       | 273                      | 4022                                      | 31.45                     | 17.35                        | 9.5                      | 28.4                        | 260                      | 0.64                                                  | 7E-03                   |
| 4                 | 2034                                   | 31.72                     | 16.97                        | 14.102                   | 29.04                       | 273                      | 4040                                      | 31.46                     | 17.42                        | 9.5                      | 28.4                        | 260                      | 0.64                                                  | 6E-03                   |
| 5                 | 2034                                   | 31.72                     | 16.97                        | 14.102                   | 29.04                       | 273                      | 4023                                      | 31.45                     | 17.57                        | 9.5                      | 28.34                       | 260                      | 0.7                                                   | 4E-03                   |
| 6                 | 2034                                   | 31.72                     | 16.97                        | 14.102                   | 29.04                       | 273                      | 4030                                      | 31.46                     | 17.57                        | 9.5                      | 28.39                       | 260                      | 0.65                                                  | 4E-03                   |
| 7                 | 2034                                   | 31.72                     | 16.97                        | 14.102                   | 29.04                       | 273                      | 4025                                      | 31.44                     | 17.47                        | 9.5                      | 28.33                       | 260                      | 0.71                                                  | 4E-03                   |
| 8                 | 2034                                   | 31.72                     | 16.97                        | 14.102                   | 29.04                       | 273                      | 4017                                      | 31.43                     | 17.22                        | 9.5                      | 28.36                       | 260                      | 0.68                                                  | 7E-03                   |
| 9                 | 2034                                   | 31.72                     | 16.97                        | 14.102                   | 29.04                       | 273                      | 4005                                      | 31.47                     | 17.38                        | 9.5                      | 28.4                        | 260                      | 0.64                                                  | 6E-03                   |
| 10                | 2034                                   | 31.72                     | 16.97                        | 14.102                   | 29.04                       | 273                      | 4024                                      | 31.36                     | 17.07                        | 9.5                      | 28.35                       | 260                      | 0.69                                                  | 3E-03                   |
| <b>Matching 3</b> |                                        |                           |                              |                          |                             |                          |                                           |                           |                              |                          |                             |                          |                                                       |                         |
| 1                 | 2034                                   | 31.72                     | 16.97                        | 14.102                   | 29.04                       | 273                      | 4008                                      | 30.96                     | 16.34                        | 11.95                    | 28.23                       | 256                      | 0.81                                                  | 8E-05                   |
| 2                 | 2034                                   | 31.72                     | 16.97                        | 14.102                   | 29.04                       | 273                      | 4021                                      | 30.95                     | 16.16                        | 11.95                    | 28.2                        | 256                      | 0.84                                                  | 1E-04                   |
| 3                 | 2034                                   | 31.72                     | 16.97                        | 14.102                   | 29.04                       | 273                      | 4000                                      | 30.98                     | 16.34                        | 11.95                    | 28.22                       | 256                      | 0.82                                                  | 1E-04                   |
| 4                 | 2034                                   | 31.72                     | 16.97                        | 14.102                   | 29.04                       | 273                      | 4008                                      | 30.93                     | 15.80                        | 11.95                    | 28.245                      | 239.77                   | 0.795                                                 | 2E-04                   |
| 5                 | 2034                                   | 31.72                     | 16.97                        | 14.102                   | 29.04                       | 273                      | 4000                                      | 30.96                     | 16.34                        | 11.95                    | 28.175                      | 256                      | 0.865                                                 | 8E-05                   |
| 6                 | 2034                                   | 31.72                     | 16.97                        | 14.102                   | 29.04                       | 273                      | 4005                                      | 30.96                     | 16.34                        | 11.95                    | 28.18                       | 256                      | 0.86                                                  | 7E-05                   |
| 7                 | 2034                                   | 31.72                     | 16.97                        | 14.102                   | 29.04                       | 273                      | 4024                                      | 30.99                     | 16.31                        | 11.95                    | 28.2                        | 256                      | 0.84                                                  | 2E-04                   |
| 8                 | 2034                                   | 31.72                     | 16.97                        | 14.102                   | 29.04                       | 273                      | 4005                                      | 30.90                     | 15.93                        | 11.95                    | 28.2                        | 239.77                   | 0.84                                                  | 7E-05                   |
| 9                 | 2034                                   | 31.72                     | 16.97                        | 14.102                   | 29.04                       | 273                      | 4015                                      | 30.88                     | 15.75                        | 11.95                    | 28.19                       | 239.77                   | 0.85                                                  | 1E-04                   |
| 10                | 2034                                   | 31.72                     | 16.97                        | 14.102                   | 29.04                       | 273                      | 4016                                      | 30.93                     | 15.93                        | 11.95                    | 28.22                       | 239.77                   | 0.82                                                  | 1E-04                   |
